# Supplementary material for: TRIB1 Is Regulated Post-Transcriptionally by Proteasomal and Non-Proteasomal Pathways
Source: PubMed Central journal article supplement (PMC4809572; doi:10.1371/journal.pone.0152346), 2016-03-28

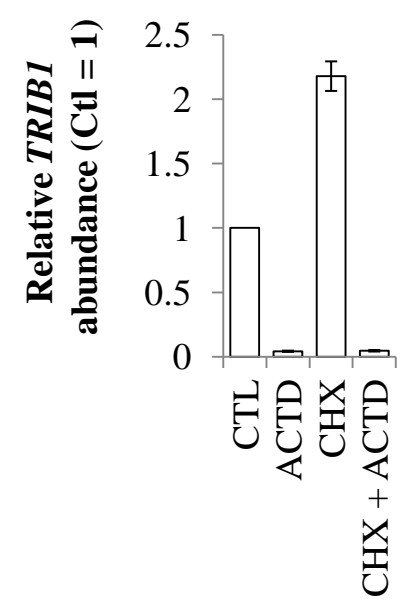

Supplement: pone.0152346.s001.pdf [file pone.0152346.s001.pdf]
